# Supplementary material for: Evaluation of marketing authorization and clinical implementation of ulipristal acetate for uterine fibroids
Source: PubMed Central journal article supplement — Hum Reprod. 2022 Feb 10;37(5):884–94. doi: 10.1093/humrep/deac009 (PMC9071218; doi:10.1093/humrep/deac009), 2022-02-10
Supplement: deac009_supplementary_table_si.pdf [file deac009_supplementary_table_si.pdf]

**Supplementary Table SI Trial information regarding the Phase III trials comparing ulipristal with long-term treatment (Euctr, 2014; Middelkoop et al., 2021).**

|                        |                                                                                                                                                                                                                                                                                                                                                                                                                                                                                                                                                                                                                                                                                                                                                                                                                                                                                                                                                                                                                                                                                                                                                                                                                                                                                                                                                                                                                                                                                                                                                                                                                                                                                                                                                                                                                                                                                                                                                                                                                                                                                                                                                                                                                                                                                                                                                                                                                                                                                                                                                                                                                |
|------------------------|----------------------------------------------------------------------------------------------------------------------------------------------------------------------------------------------------------------------------------------------------------------------------------------------------------------------------------------------------------------------------------------------------------------------------------------------------------------------------------------------------------------------------------------------------------------------------------------------------------------------------------------------------------------------------------------------------------------------------------------------------------------------------------------------------------------------------------------------------------------------------------------------------------------------------------------------------------------------------------------------------------------------------------------------------------------------------------------------------------------------------------------------------------------------------------------------------------------------------------------------------------------------------------------------------------------------------------------------------------------------------------------------------------------------------------------------------------------------------------------------------------------------------------------------------------------------------------------------------------------------------------------------------------------------------------------------------------------------------------------------------------------------------------------------------------------------------------------------------------------------------------------------------------------------------------------------------------------------------------------------------------------------------------------------------------------------------------------------------------------------------------------------------------------------------------------------------------------------------------------------------------------------------------------------------------------------------------------------------------------------------------------------------------------------------------------------------------------------------------------------------------------------------------------------------------------------------------------------------------------|
| UCON-trial             | Ulipristal acetate versus conventional management of heavy menstrual bleeding (HMB; including uterine fibroids): a randomized controlled trial and exploration of mechanism of action                                                                                                                                                                                                                                                                                                                                                                                                                                                                                                                                                                                                                                                                                                                                                                                                                                                                                                                                                                                                                                                                                                                                                                                                                                                                                                                                                                                                                                                                                                                                                                                                                                                                                                                                                                                                                                                                                                                                                                                                                                                                                                                                                                                                                                                                                                                                                                                                                          |
| Study website          | <a href="http://www.isrctn.com/ISRCTN20426843">http://www.isrctn.com/ISRCTN20426843</a>                                                                                                                                                                                                                                                                                                                                                                                                                                                                                                                                                                                                                                                                                                                                                                                                                                                                                                                                                                                                                                                                                                                                                                                                                                                                                                                                                                                                                                                                                                                                                                                                                                                                                                                                                                                                                                                                                                                                                                                                                                                                                                                                                                                                                                                                                                                                                                                                                                                                                                                        |
| EudraCT number         | 2014-003408-65                                                                                                                                                                                                                                                                                                                                                                                                                                                                                                                                                                                                                                                                                                                                                                                                                                                                                                                                                                                                                                                                                                                                                                                                                                                                                                                                                                                                                                                                                                                                                                                                                                                                                                                                                                                                                                                                                                                                                                                                                                                                                                                                                                                                                                                                                                                                                                                                                                                                                                                                                                                                 |
| Recruitment start date | 01 April 2015                                                                                                                                                                                                                                                                                                                                                                                                                                                                                                                                                                                                                                                                                                                                                                                                                                                                                                                                                                                                                                                                                                                                                                                                                                                                                                                                                                                                                                                                                                                                                                                                                                                                                                                                                                                                                                                                                                                                                                                                                                                                                                                                                                                                                                                                                                                                                                                                                                                                                                                                                                                                  |
| Funding                | National Institute for Health Research (UK)                                                                                                                                                                                                                                                                                                                                                                                                                                                                                                                                                                                                                                                                                                                                                                                                                                                                                                                                                                                                                                                                                                                                                                                                                                                                                                                                                                                                                                                                                                                                                                                                                                                                                                                                                                                                                                                                                                                                                                                                                                                                                                                                                                                                                                                                                                                                                                                                                                                                                                                                                                    |
| Study design           | A multicentre, randomized controlled trial                                                                                                                                                                                                                                                                                                                                                                                                                                                                                                                                                                                                                                                                                                                                                                                                                                                                                                                                                                                                                                                                                                                                                                                                                                                                                                                                                                                                                                                                                                                                                                                                                                                                                                                                                                                                                                                                                                                                                                                                                                                                                                                                                                                                                                                                                                                                                                                                                                                                                                                                                                     |
| Study aim              | Determine if ulipristal acetate (UPA) is more effective at reducing the burden of Heavy Menstrual Bleeding (HMB) symptoms than Levonorgestrel intrauterine system (LNG-IUS) after 12 months of treatment.                                                                                                                                                                                                                                                                                                                                                                                                                                                                                                                                                                                                                                                                                                                                                                                                                                                                                                                                                                                                                                                                                                                                                                                                                                                                                                                                                                                                                                                                                                                                                                                                                                                                                                                                                                                                                                                                                                                                                                                                                                                                                                                                                                                                                                                                                                                                                                                                      |
| Patient population     | Women who present to primary and secondary care with HMB (age $\geq$ 18 years). Participants will be recruited from the gynaecological, out-patient clinics of participating centres, fitting around their current service provision.                                                                                                                                                                                                                                                                                                                                                                                                                                                                                                                                                                                                                                                                                                                                                                                                                                                                                                                                                                                                                                                                                                                                                                                                                                                                                                                                                                                                                                                                                                                                                                                                                                                                                                                                                                                                                                                                                                                                                                                                                                                                                                                                                                                                                                                                                                                                                                          |
| Intervention           | Ulipristal acetate; up to three repeated courses alternated with 2 months medication free intervals                                                                                                                                                                                                                                                                                                                                                                                                                                                                                                                                                                                                                                                                                                                                                                                                                                                                                                                                                                                                                                                                                                                                                                                                                                                                                                                                                                                                                                                                                                                                                                                                                                                                                                                                                                                                                                                                                                                                                                                                                                                                                                                                                                                                                                                                                                                                                                                                                                                                                                            |
| Comparison             | LNG-IUS                                                                                                                                                                                                                                                                                                                                                                                                                                                                                                                                                                                                                                                                                                                                                                                                                                                                                                                                                                                                                                                                                                                                                                                                                                                                                                                                                                                                                                                                                                                                                                                                                                                                                                                                                                                                                                                                                                                                                                                                                                                                                                                                                                                                                                                                                                                                                                                                                                                                                                                                                                                                        |
| Treatment duration     | 12 months                                                                                                                                                                                                                                                                                                                                                                                                                                                                                                                                                                                                                                                                                                                                                                                                                                                                                                                                                                                                                                                                                                                                                                                                                                                                                                                                                                                                                                                                                                                                                                                                                                                                                                                                                                                                                                                                                                                                                                                                                                                                                                                                                                                                                                                                                                                                                                                                                                                                                                                                                                                                      |
| Follow-up              | 12-month questionnaire. Gynaecology clinic appointment (UPA group receive 12-month ultrasound, blood sample, endometrial biopsy. LNG-IUS group receive 12-month ultrasound and blood sample).                                                                                                                                                                                                                                                                                                                                                                                                                                                                                                                                                                                                                                                                                                                                                                                                                                                                                                                                                                                                                                                                                                                                                                                                                                                                                                                                                                                                                                                                                                                                                                                                                                                                                                                                                                                                                                                                                                                                                                                                                                                                                                                                                                                                                                                                                                                                                                                                                  |
| Outcomes measures      | <p><b>Primary outcome measure</b></p> <p>The condition-specific Menorrhagia Multi-Attribute Scale (MMAS) designed and validated to capture the impact of HMB on women's day-to-day life.</p> <p><b>Secondary outcome measures:</b></p> <ol style="list-style-type: none"> <li>(1) Menstrual bleeding will be captured by validated Pictorial Blood Loss Assessment Chart (PBAC). The standard PBAC is a validated and well used assessment of menstrual blood loss in women. The PBAC will be supplemented by visual analogue scales for menstruation duration, regularity and pelvic pain</li> <li>(2) Uterine Fibroid Symptom and Quality of Life (UFS-QoL) instrument, which contains a health related quality of life (HRQoL) domain and a symptom domain. This instrument will be only given to women diagnosed with fibroids</li> <li>(3) Sexual Activity Questionnaire, a measure of sexual functioning, used in other HMB trials. The sexual activity questionnaire is a valid, reliable and acceptable measure for describing the sexual functioning of women in terms of pleasure and discomfort. It is quick and easy to administer and has good face validity delineating between the sexual functioning of pre and post-menopausal women</li> <li>(4) Satisfaction with treatment outcome measured on a 5-point Likert scale. Specific statements about the experience and the acceptability of the treatment and the beliefs about the value of the treatment will be elicited from the participants</li> <li>(5) Adherence to trial treatments, as reported by the participant</li> <li>(6) Serious adverse events and reactions reported by participants, principally those that are serious and detailed in the respective Summary of Product Characteristics (SmPC) and those that are unexpected</li> <li>(7) Clinical measurements to assess safety and efficacy will include serum haemoglobin as appropriate, oestradiol, pelvic ultrasound (endometrial appearance; fibroid volume) and endometrial biopsies (reported according to pre-agreed criteria by independent pathologists blinded to treatment allocations)</li> <li>(8) Impact on endometrial tissue architecture including regulation of the vascular compartment</li> <li>(9) Impact on endometrial steroid responsiveness, proliferation, survival and inflammatory processes</li> <li>(10) Expression of genes implicated in pre-malignant change including tumour suppressors</li> <li>(11) Effects on uterine/fibroid structure and vascularity as determined by MRI-DCE and high-resolution structural MRI</li> </ol> |
| Intended inclusions    | Initial sample size: 220, which needed to be inflated after the first trial suspension in November 2017. This meant that all randomized women who had not completed their full 12-month UPA treatment course needed to be replaced.<br><i>Recalculated sample size after first trial suspension: 302</i>                                                                                                                                                                                                                                                                                                                                                                                                                                                                                                                                                                                                                                                                                                                                                                                                                                                                                                                                                                                                                                                                                                                                                                                                                                                                                                                                                                                                                                                                                                                                                                                                                                                                                                                                                                                                                                                                                                                                                                                                                                                                                                                                                                                                                                                                                                       |
| Temporary on hold      | First trial suspension: 30 November 2017 as per order EMA.<br>Trial recommenced September 2017.<br>Second trial suspension: 12 March 2020 as per EM                                                                                                                                                                                                                                                                                                                                                                                                                                                                                                                                                                                                                                                                                                                                                                                                                                                                                                                                                                                                                                                                                                                                                                                                                                                                                                                                                                                                                                                                                                                                                                                                                                                                                                                                                                                                                                                                                                                                                                                                                                                                                                                                                                                                                                                                                                                                                                                                                                                            |
| Recruitment end date   | Trial closed October 2020                                                                                                                                                                                                                                                                                                                                                                                                                                                                                                                                                                                                                                                                                                                                                                                                                                                                                                                                                                                                                                                                                                                                                                                                                                                                                                                                                                                                                                                                                                                                                                                                                                                                                                                                                                                                                                                                                                                                                                                                                                                                                                                                                                                                                                                                                                                                                                                                                                                                                                                                                                                      |
| Included patients      | 236                                                                                                                                                                                                                                                                                                                                                                                                                                                                                                                                                                                                                                                                                                                                                                                                                                                                                                                                                                                                                                                                                                                                                                                                                                                                                                                                                                                                                                                                                                                                                                                                                                                                                                                                                                                                                                                                                                                                                                                                                                                                                                                                                                                                                                                                                                                                                                                                                                                                                                                                                                                                            |
| Overall trial end date | 31 May 2021                                                                                                                                                                                                                                                                                                                                                                                                                                                                                                                                                                                                                                                                                                                                                                                                                                                                                                                                                                                                                                                                                                                                                                                                                                                                                                                                                                                                                                                                                                                                                                                                                                                                                                                                                                                                                                                                                                                                                                                                                                                                                                                                                                                                                                                                                                                                                                                                                                                                                                                                                                                                    |

(continued)

|                          |                                                                                                                                                                                                                                                                                                                                                                                                                                                                                                                                                                                                                                                                                                                                                                                                                                                                                                                                                                                                                                                                                                                                                                                                                                                                                                                                                                                                                                                                                                                                                                                                                                                                                                                                                                                                                                                                                                                                                                                                                                                                                                                                                                                                                                                                                                                                             |
|--------------------------|---------------------------------------------------------------------------------------------------------------------------------------------------------------------------------------------------------------------------------------------------------------------------------------------------------------------------------------------------------------------------------------------------------------------------------------------------------------------------------------------------------------------------------------------------------------------------------------------------------------------------------------------------------------------------------------------------------------------------------------------------------------------------------------------------------------------------------------------------------------------------------------------------------------------------------------------------------------------------------------------------------------------------------------------------------------------------------------------------------------------------------------------------------------------------------------------------------------------------------------------------------------------------------------------------------------------------------------------------------------------------------------------------------------------------------------------------------------------------------------------------------------------------------------------------------------------------------------------------------------------------------------------------------------------------------------------------------------------------------------------------------------------------------------------------------------------------------------------------------------------------------------------------------------------------------------------------------------------------------------------------------------------------------------------------------------------------------------------------------------------------------------------------------------------------------------------------------------------------------------------------------------------------------------------------------------------------------------------|
| Protocol adaptations     | <p><b>Current secondary outcome measures as of 21 May 2020:</b></p> <ol style="list-style-type: none"> <li>(1) Menstrual bleeding will be captured by validated PBAC</li> <li>(2) Cycle regularity and duration</li> <li>(3) Visual analogue scales (0–10) for pelvic pain during periods, intercourse and at other times.</li> <li>(4) Sexual Activity Questionnaire, a measure of sexual functioning, used in other HMB trials</li> <li>(5) General quality of life (EuroQoL—EQ-5D-5L) and ICECAP-A</li> <li>(6) Satisfaction with treatment on a 5-point Likert scale</li> <li>(7) Participant rating of effect of treatment on HMB over 12 months measured on a 4-point Likert scale</li> <li>(8) Whether participant is willing to recommend the treatment to a friend</li> <li>(9) Surgical intervention (hysterectomy, endometrial ablation and other gynaecological surgery)</li> <li>(10) Adherence to trial treatments and reasons for changing treatment, as reported by the participant</li> <li>(11) Serious adverse events and reactions reported by participants, principally those that are serious and detailed in the respective SmPC and those that are unexpected</li> <li>(12) Clinical measurements via pelvic ultrasound: uterine volume, evidence of adenomyosis, presence of fibroids, largest fibroid volume, endometrial thickness, endometrial appearance (regular/irregular), evidence of ovarian cysts</li> <li>(13) Clinical measurement via endometrial biopsy: primary diagnosis (normal/benign/hyperplasia/malignant) and further sub-diagnoses if non-normal</li> <li>(14) Clinical measurement via blood samples: liver function (including alanine transaminase (ALT) and aspartate aminotransferase (AST) and other tests according to local protocols) serum haemoglobin and oestradiol levels</li> <li>(15) Functional outcomes</li> <li>(16) Impact on endometrial tissue architecture including regulation of the vascular compartment</li> <li>(17) Impact on endometrial steroid responsiveness, proliferation, survival and inflammatory processes</li> <li>(18) Expression of genes implicated in pre-malignant change including tumour suppressors</li> <li>(19) Effects on uterine/fibroid structure and vascularity as determined by MRI-DCE and high resolution structural MRI</li> </ol> |
| Other                    | Results expected 2022                                                                                                                                                                                                                                                                                                                                                                                                                                                                                                                                                                                                                                                                                                                                                                                                                                                                                                                                                                                                                                                                                                                                                                                                                                                                                                                                                                                                                                                                                                                                                                                                                                                                                                                                                                                                                                                                                                                                                                                                                                                                                                                                                                                                                                                                                                                       |
| <b>MYOMEX-2 Trial</b>    | Ulipristal versus standard surgical treatment in symptomatic uterine fibroids                                                                                                                                                                                                                                                                                                                                                                                                                                                                                                                                                                                                                                                                                                                                                                                                                                                                                                                                                                                                                                                                                                                                                                                                                                                                                                                                                                                                                                                                                                                                                                                                                                                                                                                                                                                                                                                                                                                                                                                                                                                                                                                                                                                                                                                               |
| Study website            | <a href="https://zorgevaluatienederland.nl/evaluations/myomex-2">https://zorgevaluatienederland.nl/evaluations/myomex-2</a> (Dutch only)                                                                                                                                                                                                                                                                                                                                                                                                                                                                                                                                                                                                                                                                                                                                                                                                                                                                                                                                                                                                                                                                                                                                                                                                                                                                                                                                                                                                                                                                                                                                                                                                                                                                                                                                                                                                                                                                                                                                                                                                                                                                                                                                                                                                    |
| EudraCT number           | 2017-005120-16                                                                                                                                                                                                                                                                                                                                                                                                                                                                                                                                                                                                                                                                                                                                                                                                                                                                                                                                                                                                                                                                                                                                                                                                                                                                                                                                                                                                                                                                                                                                                                                                                                                                                                                                                                                                                                                                                                                                                                                                                                                                                                                                                                                                                                                                                                                              |
| Recruitment start date   | 13 December 2018                                                                                                                                                                                                                                                                                                                                                                                                                                                                                                                                                                                                                                                                                                                                                                                                                                                                                                                                                                                                                                                                                                                                                                                                                                                                                                                                                                                                                                                                                                                                                                                                                                                                                                                                                                                                                                                                                                                                                                                                                                                                                                                                                                                                                                                                                                                            |
| Funding                  | NWO (Nederlands Organisatie voor Wetenschappelijk Onderzoek) ZonMW<br>NWO: Dutch Organization for Scientific Research; ZonMw is a Public Benefit Organization                                                                                                                                                                                                                                                                                                                                                                                                                                                                                                                                                                                                                                                                                                                                                                                                                                                                                                                                                                                                                                                                                                                                                                                                                                                                                                                                                                                                                                                                                                                                                                                                                                                                                                                                                                                                                                                                                                                                                                                                                                                                                                                                                                               |
| Study design             | A multicentre, randomized controlled trial                                                                                                                                                                                                                                                                                                                                                                                                                                                                                                                                                                                                                                                                                                                                                                                                                                                                                                                                                                                                                                                                                                                                                                                                                                                                                                                                                                                                                                                                                                                                                                                                                                                                                                                                                                                                                                                                                                                                                                                                                                                                                                                                                                                                                                                                                                  |
| Study aim                | To investigate the (cost-) effectiveness of ulipristal acetate (UPA) long-term administration in comparison to 'standard' surgical treatment in patients with moderate to severe complaints due to uterine fibroids.                                                                                                                                                                                                                                                                                                                                                                                                                                                                                                                                                                                                                                                                                                                                                                                                                                                                                                                                                                                                                                                                                                                                                                                                                                                                                                                                                                                                                                                                                                                                                                                                                                                                                                                                                                                                                                                                                                                                                                                                                                                                                                                        |
| Patient population       | Pre-menopausal women (age $\geq$ 18 years) with one or multiple symptomatic fibroids requiring surgical treatment.                                                                                                                                                                                                                                                                                                                                                                                                                                                                                                                                                                                                                                                                                                                                                                                                                                                                                                                                                                                                                                                                                                                                                                                                                                                                                                                                                                                                                                                                                                                                                                                                                                                                                                                                                                                                                                                                                                                                                                                                                                                                                                                                                                                                                          |
| Intervention             | Ulipristal acetate; up to four repeated courses alternated with 2 months medication free intervals                                                                                                                                                                                                                                                                                                                                                                                                                                                                                                                                                                                                                                                                                                                                                                                                                                                                                                                                                                                                                                                                                                                                                                                                                                                                                                                                                                                                                                                                                                                                                                                                                                                                                                                                                                                                                                                                                                                                                                                                                                                                                                                                                                                                                                          |
| Comparison               | Surgical treatment, can be either uterine artery embolization (UAE), myomectomy or hysterectomy. All mode of surgery apply (laparoscopic and laparotomy and in case of hysterectomy: vaginal approach is also included)                                                                                                                                                                                                                                                                                                                                                                                                                                                                                                                                                                                                                                                                                                                                                                                                                                                                                                                                                                                                                                                                                                                                                                                                                                                                                                                                                                                                                                                                                                                                                                                                                                                                                                                                                                                                                                                                                                                                                                                                                                                                                                                     |
| Treatment duration (UPA) | Up to four intermittent courses. Patients will be 'on medication' for a total duration of 13 (3 courses) to 18 months (4 courses), including 2 or 3 medication free intervals of 2 months.                                                                                                                                                                                                                                                                                                                                                                                                                                                                                                                                                                                                                                                                                                                                                                                                                                                                                                                                                                                                                                                                                                                                                                                                                                                                                                                                                                                                                                                                                                                                                                                                                                                                                                                                                                                                                                                                                                                                                                                                                                                                                                                                                  |
| Follow-up                | 24 months after start ulipristal or surgery                                                                                                                                                                                                                                                                                                                                                                                                                                                                                                                                                                                                                                                                                                                                                                                                                                                                                                                                                                                                                                                                                                                                                                                                                                                                                                                                                                                                                                                                                                                                                                                                                                                                                                                                                                                                                                                                                                                                                                                                                                                                                                                                                                                                                                                                                                 |
| Outcomes measures        | <p><b>Primary outcome measures with regard to patient:</b><br/>Fibroid-specific quality of life, measured by the Symptom Severity Score (SSS) as a part of the Uterine Fibroid Symptom Quality of Life (UFS-QOL) questionnaire outcome at 24 months after randomization.</p> <p><b>Primary outcome measures with regard to costs (using internet medical consumption questionnaires; iMCQ):</b></p> <ol style="list-style-type: none"> <li>(1) Direct healthcare costs</li> <li>(2) Costs due to loss of productivity (absenteeism from work)</li> <li>(3) Patient costs (informal care, other care services paid for by patients themselves)</li> </ol> <p><b>Secondary outcome measures with regard to patient:</b></p> <ol style="list-style-type: none"> <li>(1) What is the effect of the intervention on quality of life parameters, such as pain, societal participation and sexual functioning?</li> <li>(2) What is the effect of the intervention on fibroid specific complaints such as volume reduction (UPA group); amount of menstrual bleeding (PBAC-score) and haemoglobin level.</li> <li>(3) What is the re-intervention rate in both treatment groups and how many patients choose for an intervention after treatment with UPA?</li> <li>(4) What is the effect on patient preference and satisfaction?</li> <li>(5) Which complications/side-effects occur?</li> <li>(6) What is the effect of UPA-usage on the blood results, regarding liver function?</li> <li>(7) Which sub-groups benefit most within the study group (subgroup-analysis)</li> </ol>                                                                                                                                                                                                                                                                                                                                                                                                                                                                                                                                                                                                                                                                                                                                                              |

(continued)

---

|                        |                                                                                                                                                                                                                                                                                                                                                                                                                                                                                                                             |
|------------------------|-----------------------------------------------------------------------------------------------------------------------------------------------------------------------------------------------------------------------------------------------------------------------------------------------------------------------------------------------------------------------------------------------------------------------------------------------------------------------------------------------------------------------------|
| Intended inclusions    | 179                                                                                                                                                                                                                                                                                                                                                                                                                                                                                                                         |
| Temporary on hold      | Patients are randomly assigned in a 2:1 ratio to two groups. Intervention group: 119; Comparison group: 60<br>Currently on hold from 18 March 2020.<br>Reason: PRAC Article 31 Referral procedure <ul style="list-style-type: none"><li>• PRAC recommendation date: 04 September 2020. Recommendation: Revoke marketing authorization of ulipristal acetate for uterine fibroids</li><li>• CHMP recommendation date: 13 November 2020. Recommendation: Restricting use of ulipristal acetate for uterine fibroids</li></ul> |
| Recruitment end date   | –                                                                                                                                                                                                                                                                                                                                                                                                                                                                                                                           |
| Included patients      | 38                                                                                                                                                                                                                                                                                                                                                                                                                                                                                                                          |
| Overall trial end date | –                                                                                                                                                                                                                                                                                                                                                                                                                                                                                                                           |
| Protocol adaptations   | –                                                                                                                                                                                                                                                                                                                                                                                                                                                                                                                           |
| Other                  | Currently still on hold, awaiting European Commission Final decision                                                                                                                                                                                                                                                                                                                                                                                                                                                        |

---
